# Supplementary material for: Transforming waste biomass with an intrinsically porous network structure into porous nitrogen-doped graphene for highly efficient oxygen reduction
Source: Royal Society of Chemistry journal article supplement (doi:10.1039/c6cp00174b), 2016-01-01
Supplement: c6cp00174b1.pdf [file c6cp00174b1.pdf]

Cite this: DOI: 10.1039/c0xx00000x

www.rsc.org/xxxxxx

**Electronic Supporting Information****Transforming waste biomass with an intrinsically porous network structure into porous nitrogen-doped graphene for highly efficient oxygen reduction**

5 Huang Zhou, Jian Zhang, Ibrahim Saana Amiinu, Chenyu Zhang, Xiaobo Liu, Wenmao Tu, Mu Pan  
and Shichun Mu\*

State Key Laboratory of Advanced Technology for Materials Synthesis and Processing

Wuhan University of Technology, Wuhan, 430070 P. R. China

\* Corresponding author: Tel: +86 27 87651837, E-mail: msc@whut.edu.cn

10

**List of figure captions**

**Figure S1** TEM images (a and b) of SBS-K-A, the FESEM image (c) and HR-TEM image (d) of Vulcan XC-72 carbon with KOH activation. Red arrows indicate pores.

15 **Figure S2** Nitrogen adsorption-desorption isotherm of (a) SBS-K and (b) SBS-Ar.

**Figure S3** XPS spectra of surface chemical composition (a) and N1s spectra (b) of SBS-Ar, (c) Tafel plots for SBS-K-A and Pt/C extracted from **Fig.2b** (d) the stability of Pt/C before and after i-t test in 0.1M KOH solution with O<sub>2</sub>-saturation during a constant potential -0.35 V and a rotation rate of 1,600 rpm,

**Figure S4** (a) Nyquist plots of SBS-K-A and SBS-Ar, (b) LSV curves of SBS-K-A at different rotation rates, (c) the corresponding  
20 K-L plots of SBS-K-A (inset: the electron transfer number n at the various potentials of SBS-K-A) and (d) the CO tolerance ( $V_{CO}/V_{O_2} \approx 10\%$ ) of SBS-K-A and Pt/C in 0.1M HClO<sub>4</sub> solution with O<sub>2</sub>-saturation during a constant potential at 0.3V and a rotation rate of 1,600 rpm. Data (b and c) were recorded in 0.1M HClO<sub>4</sub> solution.

**TableS1** The content (%) of C, N and O, and the content of N species (%) of SBS-K-A and SBS-Ar.

5

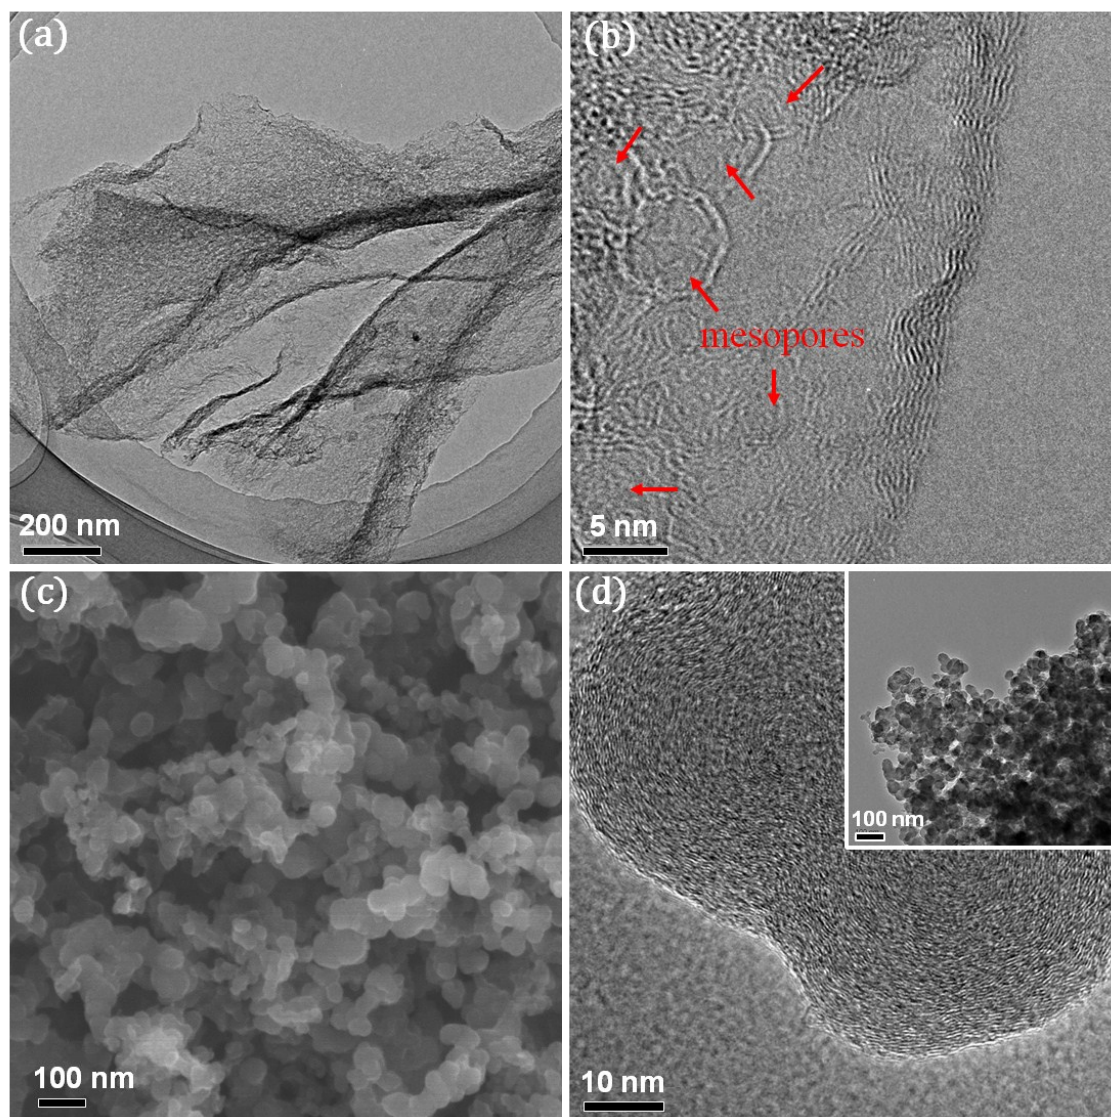

**Figure S1** TEM images (a and b) of SBS-K-A, the FESEM image (c) and HR-TEM image (d) of Vulcan XC-72 carbon with KOH activation. Red arrows indicate pores.

10

Cite this: DOI: 10.1039/c0xx00000x

www.rsc.org/xxxxxx

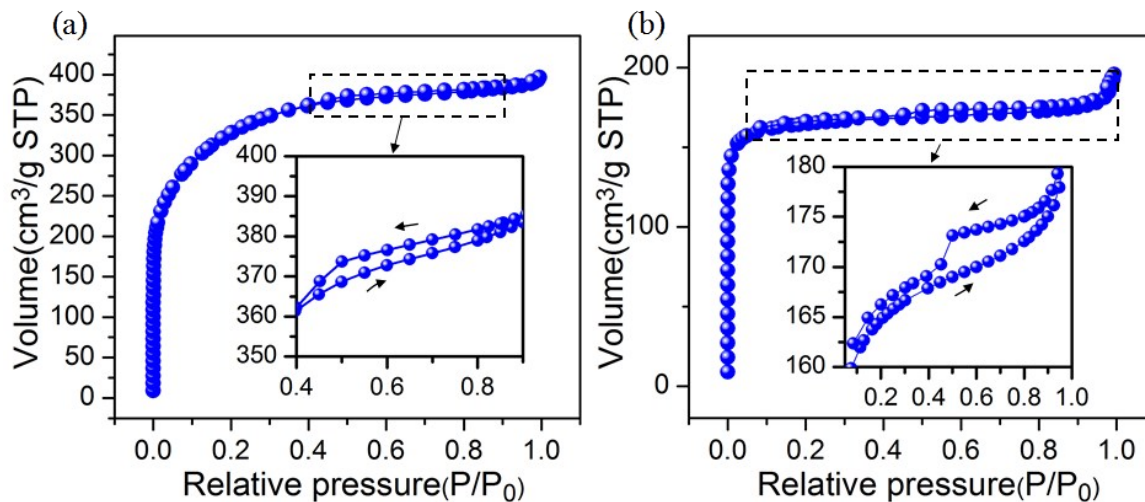

Figure S2 Nitrogen adsorption-desorption isotherm of (a) SBS-K and (b) SBS-Ar.

5

10

15

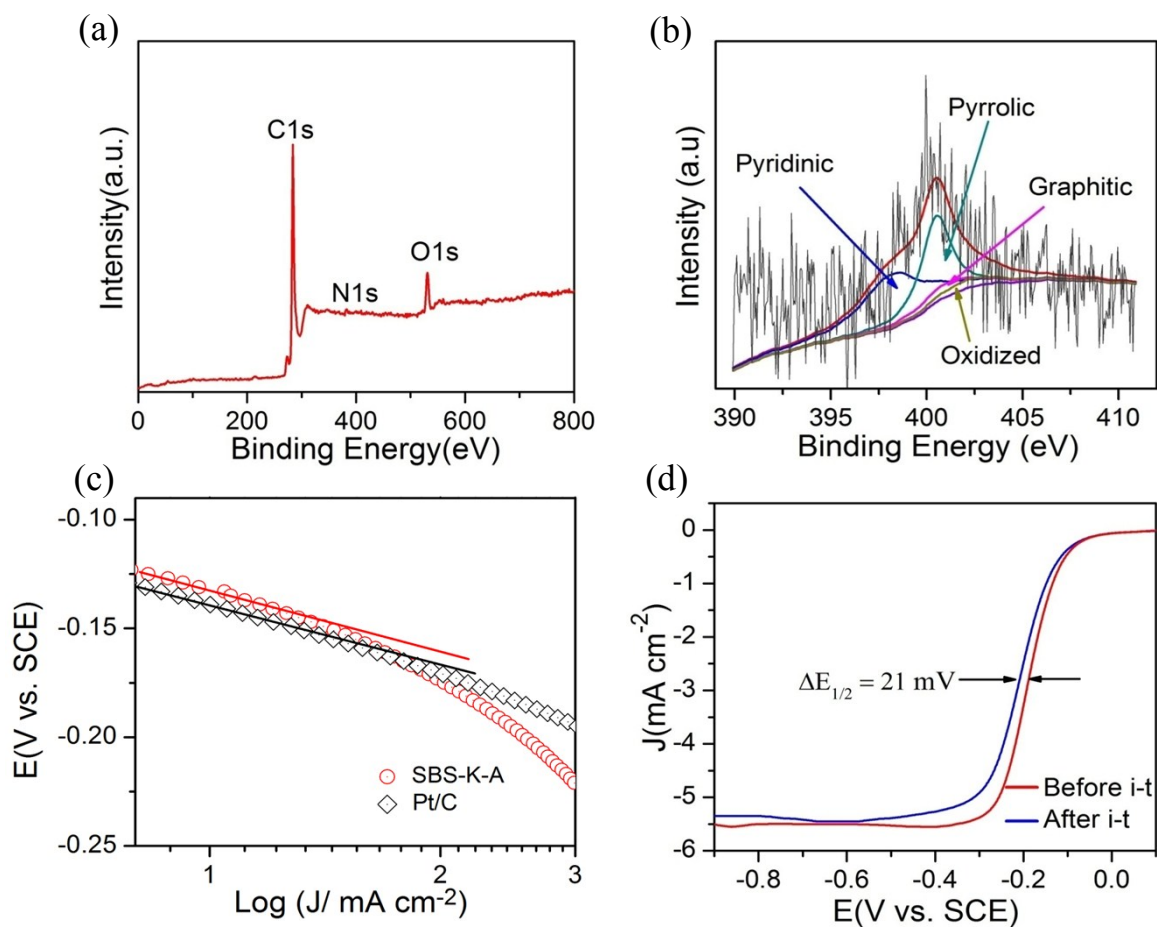

**Figure S3** XPS spectra of surface chemical composition (a) and N1s spectra (b) of SBS-Ar, (c) Tafel plots for SBS-K-A and Pt/C  
 5 extracted from **Fig.2b** (d) the stability of Pt/C before and after i-t test in 0.1M KOH solution with O<sub>2</sub>-saturation during a constant potential at -0.35 V and a rotation rate of 1,600 rpm,

Cite this: DOI: 10.1039/c0xx00000x

www.rsc.org/xxxxxx

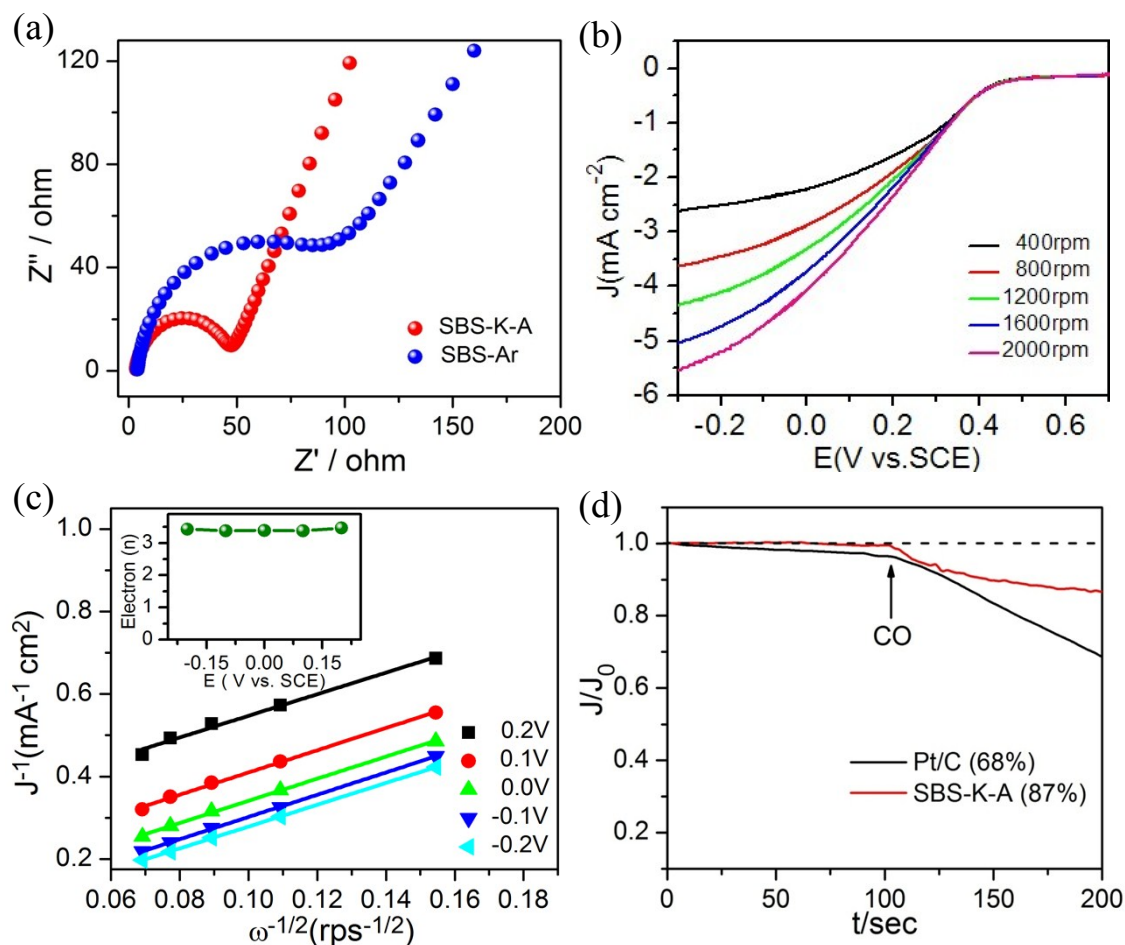

**Figure S4** (a) Nyquist plots of SBS-K-A and SBS-Ar, (b) LSV curves of SBS-K-A at different rotation rates, (c) the corresponding K-L plots of SBS-K-A (inset: the electron transfer number  $n$  at the various potentials of SBS-K-A) and (d) the CO tolerance ( $V_{CO}/V_{O_2} \approx 10\%$ ) of SBS-K-A and Pt/C in 0.1M HClO<sub>4</sub> solution with O<sub>2</sub>-saturation during a constant potential at 0.3V and a rotation rate of 1,600 rpm.

5 Data (b and c) were recorded in 0.1M HClO<sub>4</sub> solution.

**Table S1** The content (%) of C, N and O, and the content of N species (%) of SBS-K-A and SBS-Ar.

| Sample  | Content (%) |       |       | Content of N species (%) |           |          |           |
|---------|-------------|-------|-------|--------------------------|-----------|----------|-----------|
|         | C (%)       | N (%) | O (%) | Oxidized                 | Graphitic | Pyrrolic | Pyridinic |
| SBS-K-A | 84.73       | 5.73  | 9.54  | 0.88                     | 0.45      | 1.63     | 2.77      |
| SBS-Ar  | 89.25       | 0.55  | 10.20 | 0.04                     | 0.06      | 0.20     | 0.25      |
